# Supplementary material
Source: Royal Society of Chemistry journal article supplement (doi:10.1039/d6cy00259e)
Supplement: d6cy00259e1.pdf [file d6cy00259e1.pdf]

## Supporting Information

# Highly selective hydrocracking of polypropylene to gasoline-range fuel over Pt/MCM-22 catalyst

*Jiawei Xu<sup>a,b</sup>, Huijuan Han<sup>a</sup>, Yumeng Zhao<sup>b</sup>, Qilu Li<sup>b</sup>, Rongyu Yang<sup>b</sup>, Yuhan Yang<sup>a</sup>, Hao Xu<sup>c</sup>, Shichao Han<sup>b,\*</sup>, Xiaomin Tang<sup>d,\*</sup>, Longfeng Zhu<sup>a,\*</sup>, Qinming Wu<sup>e</sup>, and Jiusheng Li<sup>b</sup>*

<sup>a</sup> College of Biological, Chemical Science and Engineering, Jiaying University, Jiaying 314001, China

<sup>b</sup> Shanghai Advanced Research Institute, Chinese Academy of Sciences, Shanghai 201210, China

<sup>c</sup> Zhejiang Collaborative Innovation Center for Full-Process Monitoring and Green Governance of Emerging Contaminants, College of Biology and Environmental Engineering, Zhejiang Shuren University, Hangzhou 310015, China

<sup>d</sup> *State Key Laboratory of Magnetic Resonance Spectroscopy and Imaging, Innovation Academy for Precision Measurement Science and Technology, Chinese Academy of Sciences, Wuhan 430071, China*

<sup>e</sup> College of Chemical and Biological Engineering, Zhejiang University, Hangzhou 310027, China

## Materials

Polypropylene (PP, melt flow index: 4 g/10 min, Aladdin Chemistry Co., Ltd.; PP, melt flow index: 3.5 g/10 min, Titan Scientific Co., Ltd.; PP, melt flow index: 32 g/10 min, shanghai SECCO Petrochemical Co., Ltd.), zeolites were bought from Nankai University Catalyst Co., Ltd., including MCM-22, ZSM-5, Beta, FER, MOR, ZSM-22, MCM-41, and Y, *n*-tetradecane (C<sub>14</sub>H<sub>30</sub>, GC, 99%, Shanghai Adamas Reagent Co., Ltd.), *n*-octacosane (C<sub>28</sub>H<sub>58</sub>, RG, 99%, Shanghai Adamas Reagent Co., Ltd.), chloroplatinic acid (H<sub>2</sub>PtCl<sub>6</sub>·6H<sub>2</sub>O, RG, 99.9%, Shanghai Adamas Reagent Co., Ltd.), ruthenium(III) chloride (RuCl<sub>3</sub>·xH<sub>2</sub>O, RG, 99.95%, Shanghai Adamas Reagent Co., Ltd.), nickel(II) nitrate (Ni(NO<sub>3</sub>)<sub>2</sub>·6H<sub>2</sub>O, AR, 98%, Sinopharm Chemical Reagent Co., Ltd.), palladium(II) nitrate (Pd(NO<sub>3</sub>)<sub>2</sub>·2H<sub>2</sub>O, AR, Sinopharm Chemical Reagent Co., Ltd.).

## Characterizations

X-ray diffraction (XRD) data of the samples were collected with a Rigaku Ultimate VI X-ray diffractometer (40 kV, 40 mA) using CuK $\alpha$  radiation ( $\lambda=1.5406 \text{ \AA}$ ). Scanning electron microscopy (SEM) experiments were conducted on a JEOL JSM-7401F electron microscope. Scanning transmission electron microscopy (STEM) and energy dispersive spectroscopy (EDS) elemental maps were conducted on a JEOL JSM-2100F transmission electron microscope. N<sub>2</sub> sorption isotherms at the temperature of liquid nitrogen were measured using Micromeritics Autosorb-iQ. NH<sub>3</sub> temperature-programmed desorption (NH<sub>3</sub>-TPD) was performed on a fully automatic instrument (McKenna Instruments AutoChem 2920). 100 mg of the sample (20-40 mesh) was placed into a quartz tube and pretreated in a He flow at 400 °C for 30 min. The temperature was then reduced to 50 °C for NH<sub>3</sub> adsorption in a He gas mixture flow (30 mL/min) for 1 h. After saturation, the catalyst was purged by a He gas flow (30 mL/min) for 1 h to remove physically adsorbed NH<sub>3</sub> on the surface. Finally, the signal of NH<sub>3</sub> desorption was monitored by a thermal conductivity detector (TCD) with the sample heating from 50 to 600 °C at a rate of 10 °C/min under a He flow. The fourier transform infrared spectra of adsorbed pyridine (Py-IR) were measured on a Thermo Fisher Nicolet 380 spectrometer. The sample was activated at 400 °C under vacuum for 1 h, followed by adsorbing pyridine vapor at 30 °C for 1 h. Then the adsorbed pyridine was degassed at 150 °C and 350 °C for 1 h, respectively. X-ray photoelectron spectroscopy (XPS) measurements were performed on a Thermo

Scientific ESCALAB 250Xi photoelectron spectrometer with Al K $\alpha$  radiation. The binding energy was calibrated by the C 1s peak at 284.8 eV. The compositions of the samples were determined by Perkin-Elmer Avio 200 inductively coupled plasma optical emission spectrometer (ICP-OES). Thermogravimetric analysis (TGA) was performed on a TGA 55 (TA Instruments) on flow of air or N<sub>2</sub> from room temperature to 800 °C at a heating rate of 10 °C/min. The melting points of PP and the solid residues were measured by Mettler Toledo DSC 3/500. The liquid was obtained and analyzed with a gas chromatography-mass spectrometry (Thermo Fisher Scientific Trace1310-ISQ) equipped with a flame ionization detector (FID) and HP-5 column (30 m  $\times$  0.32 mm  $\times$  0.25  $\mu$ m).

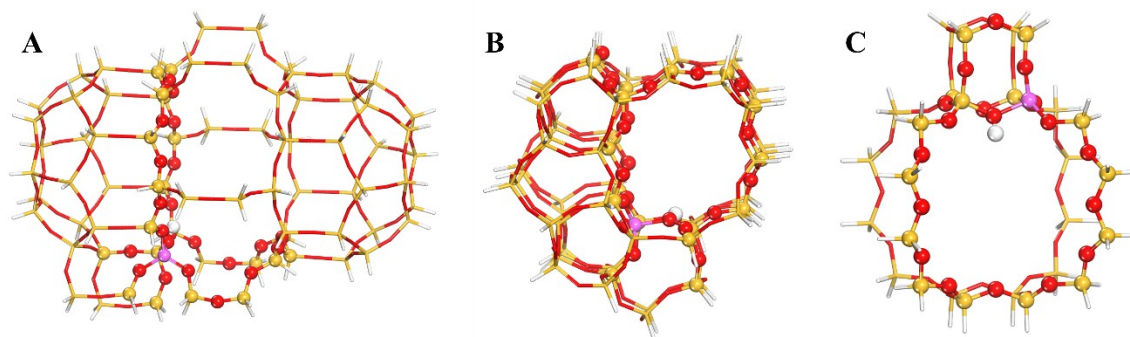

**Figure S1.** Initial structures of (A) H-MWW, (B) H-MFI, and (C) H-BEC, respectively.

The structures adopted the ONIOM model, in which the higher-level atoms were represented by spheres and the lower-level atoms by sticks. Si, Al, O and H atoms are displayed in yellow, pink, red and white, respectively.

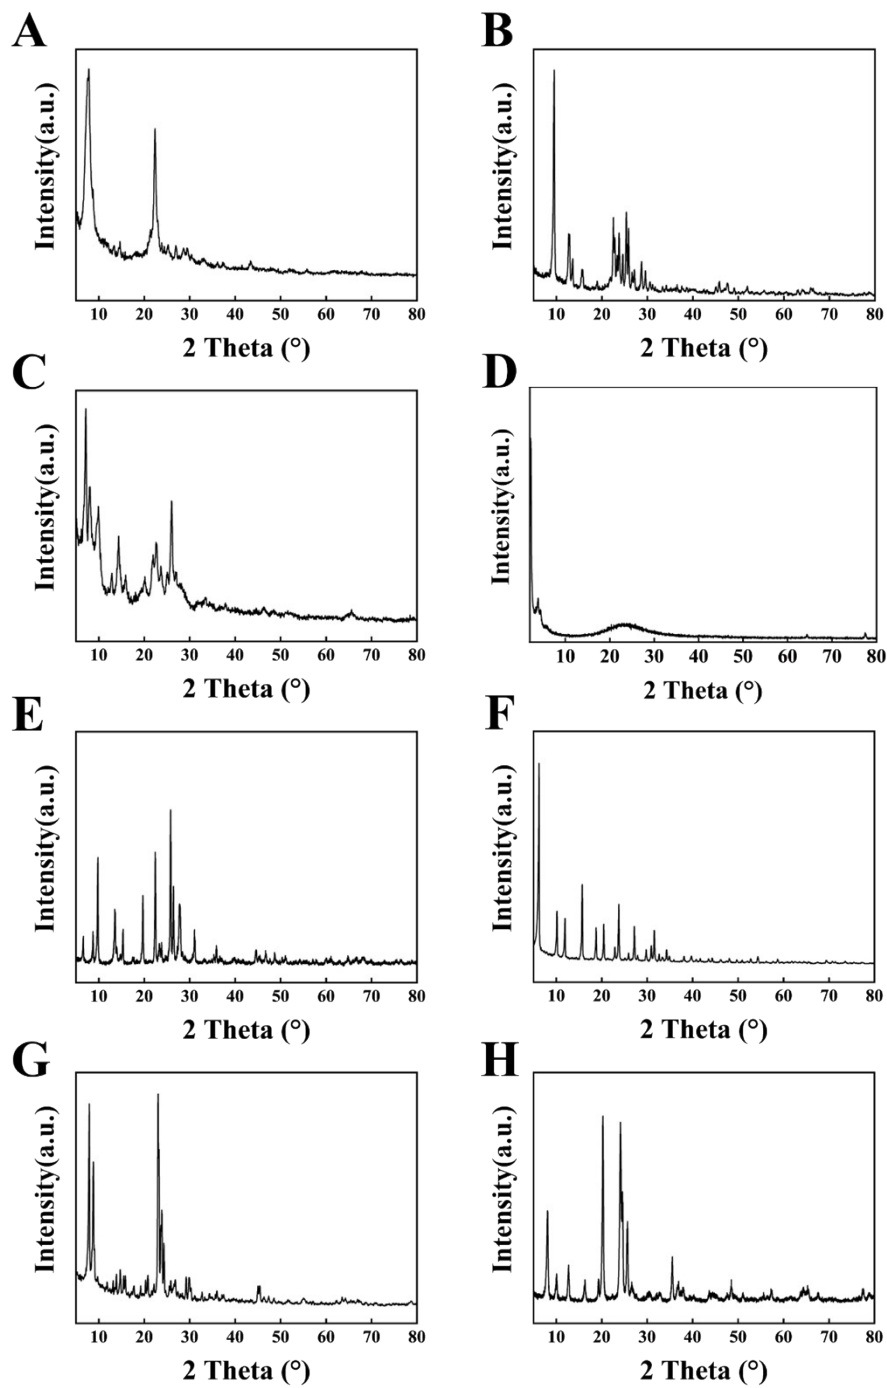

**Figure S2.** XRD patterns of (A) Pt/Beta, (B) Pt/FER, (C) Pt/MCM-22, (D) Pt/MCM-41, (E) Pt/MOR, (F) Pt/Y, (G) Pt/ZSM-5, and (H) Pt/ZSM-22 catalysts.

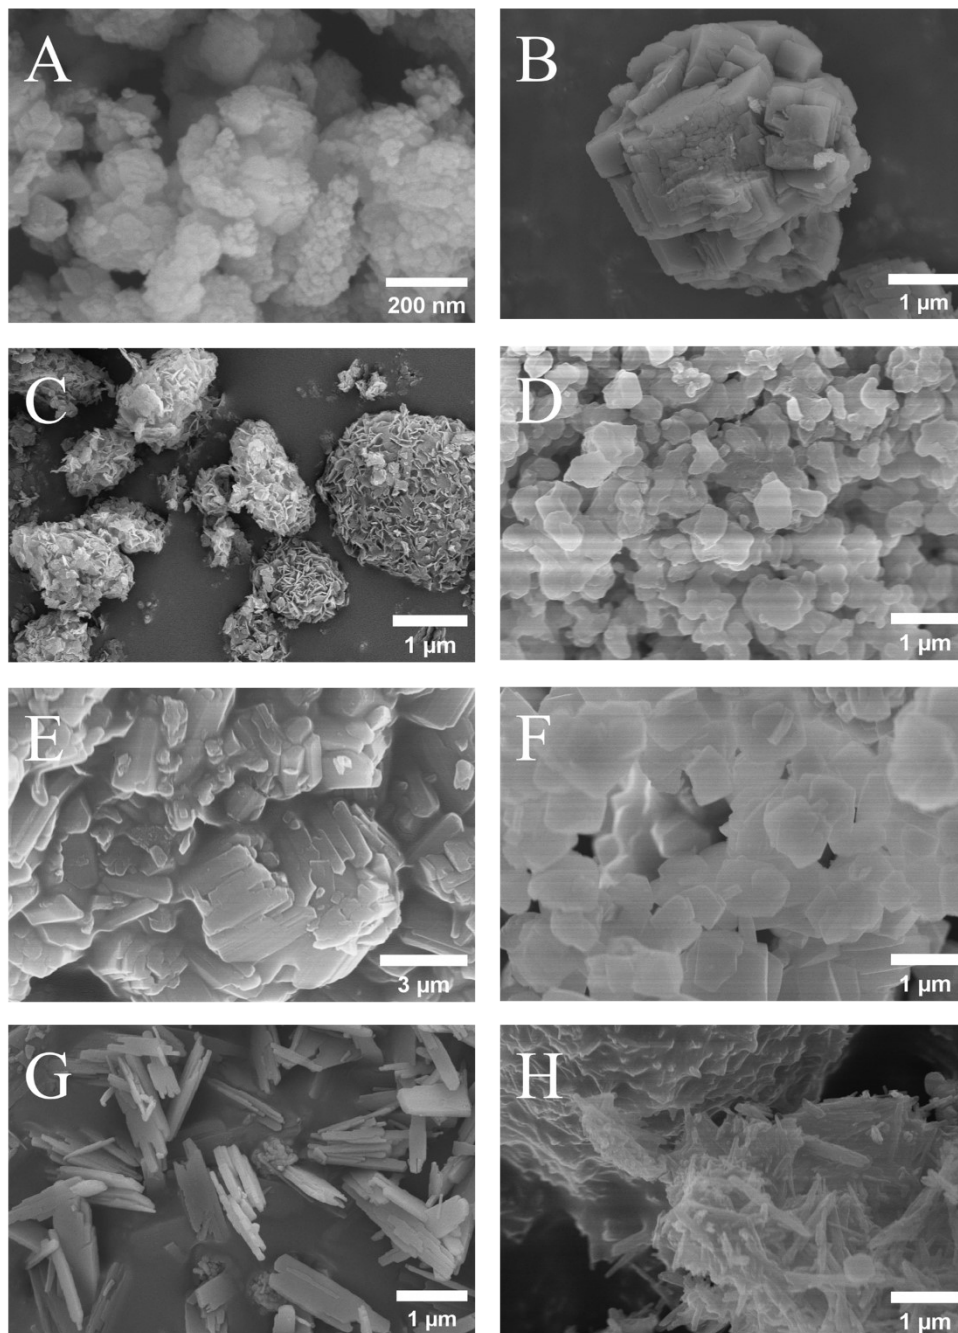

**Figure S3.** SEM images of (A) Pt/Beta, (B) Pt/FER, (C) Pt/MCM-22, (D) Pt/MCM-41, (E) Pt/MOR, (F) Pt/Y, (G) Pt/ZSM-5, and (H) Pt/ZSM-22 catalysts.

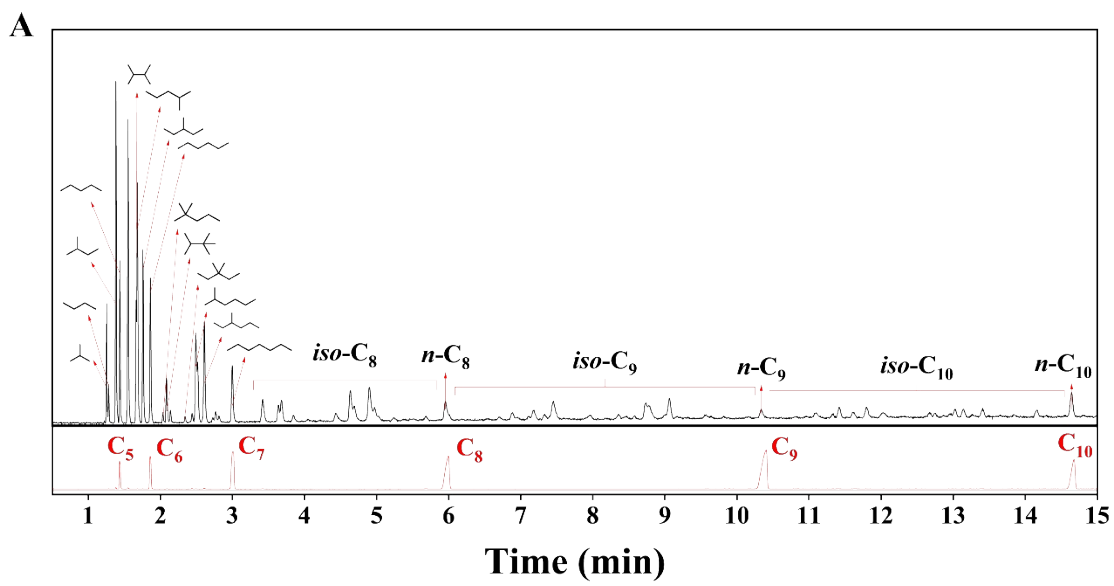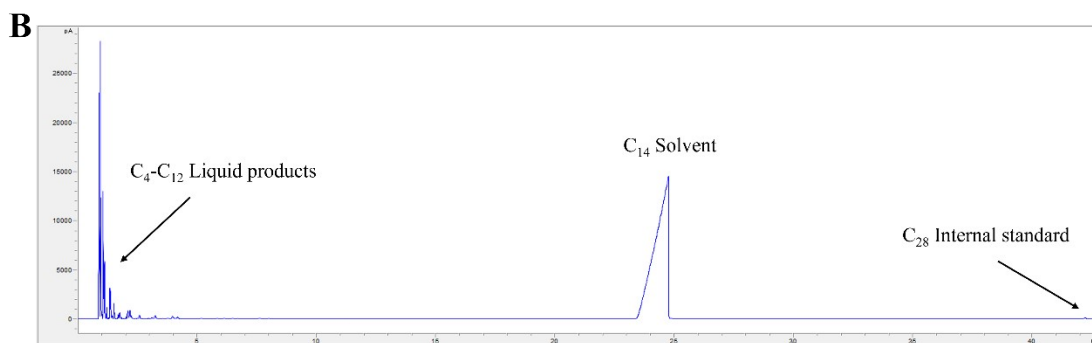

**Figure S4.** (A) GC-MS and (B) GC analysis of liquid products (C<sub>4</sub>-C<sub>10</sub>) from the catalytic PP upcycling using *n*-alkanes as the reference standard.

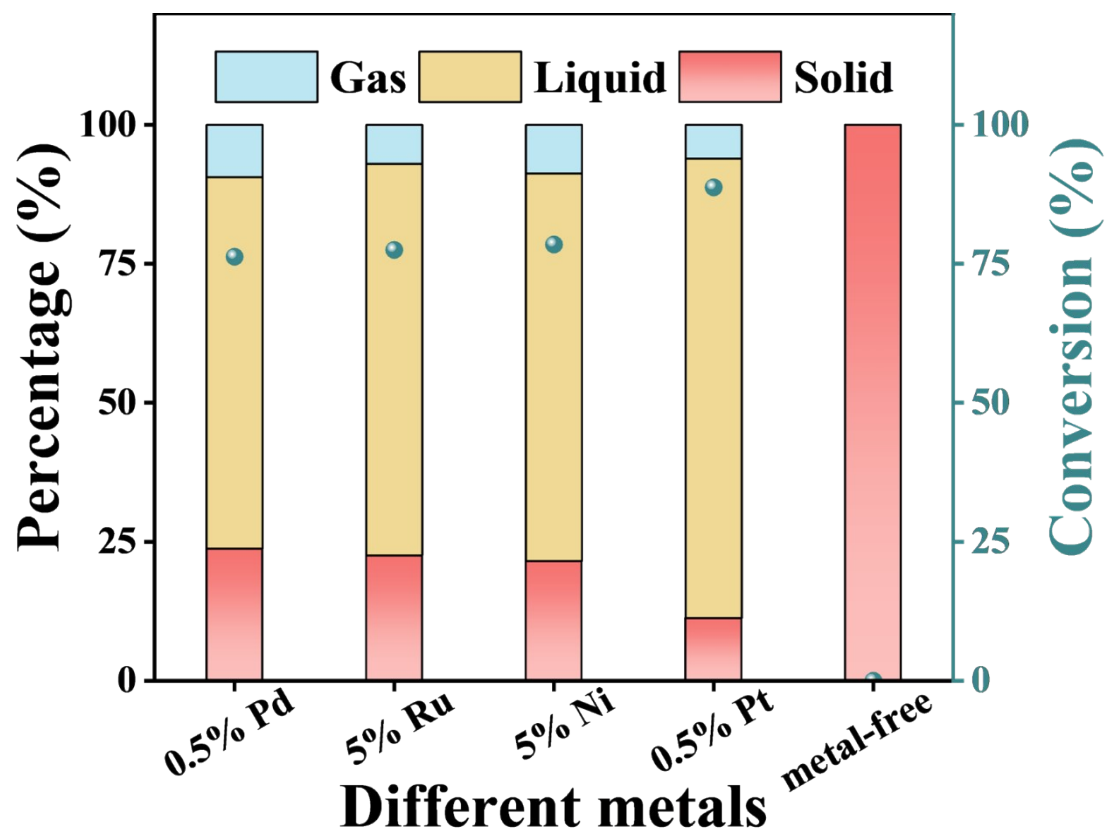

**Figure S5.** PP hydrocracking over different metal-based MCM-22 catalysts. Reaction condition: 275 °C, 3 MPa H<sub>2</sub>, 4 h, 15 g PP, and 0.75 g catalyst.

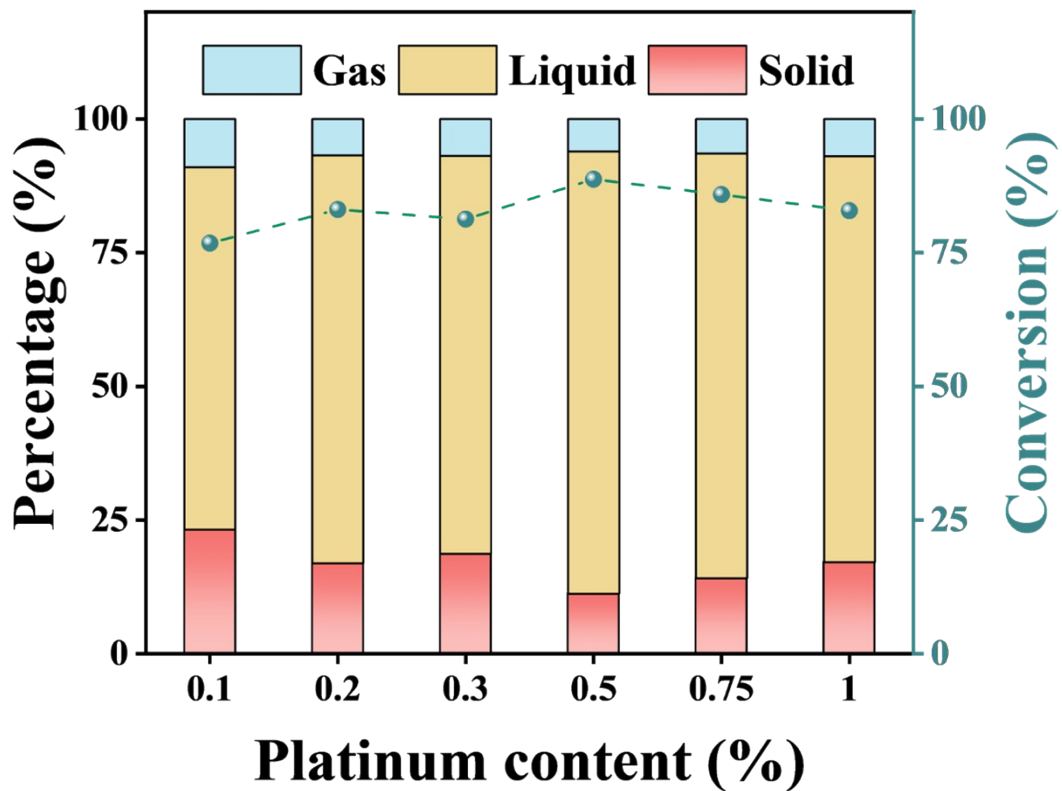

**Figure S6.** PP hydrocracking over Pt/MCM-22 catalysts with different Pt contents.

Reaction condition: 275 °C, 3 MPa H<sub>2</sub>, 4 h, 15 g PP, and 0.75 g catalyst.

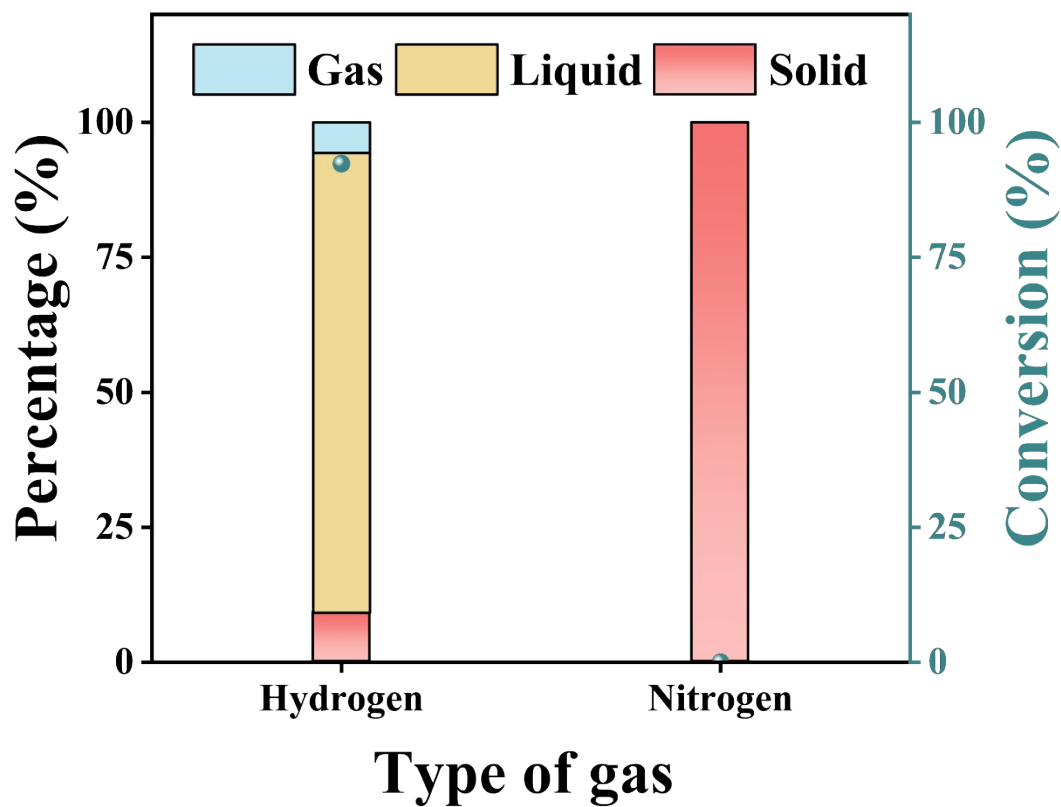

**Figure S7.** PP cracking over Pt/MCM-22 catalysts under H<sub>2</sub> or N<sub>2</sub> atmosphere. Reaction conditions: 275 °C, 3 MPa pressure, 4 h, 15 g PP, and 0.75 g catalyst.

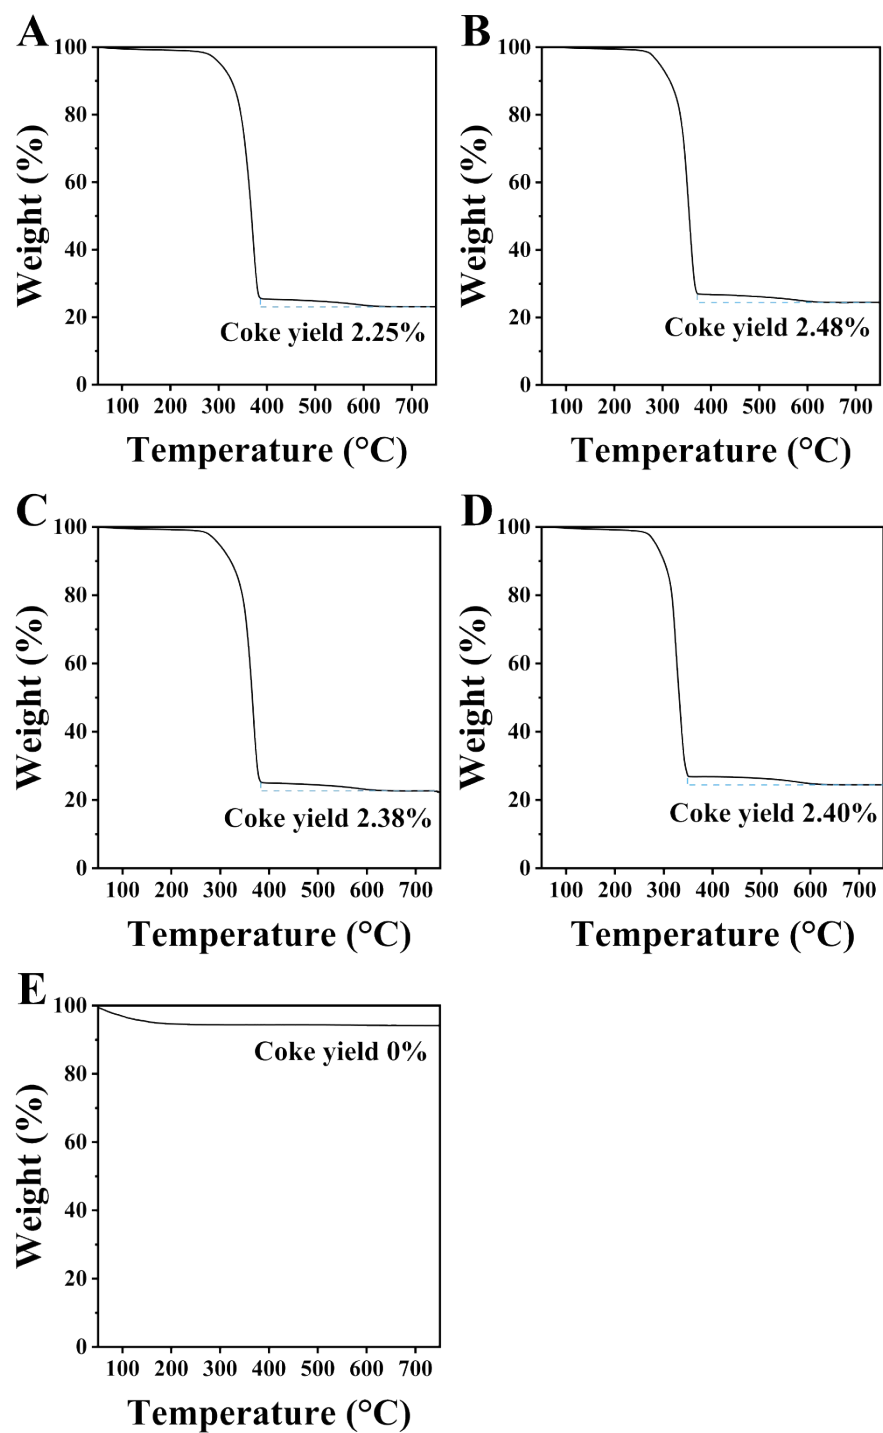

**Figure S8.** TGA curve of catalysts used after (A) 1, (B) 2, (C) 3, (D) 4 cycles, and (E) catalyst regenerated under air conditions.

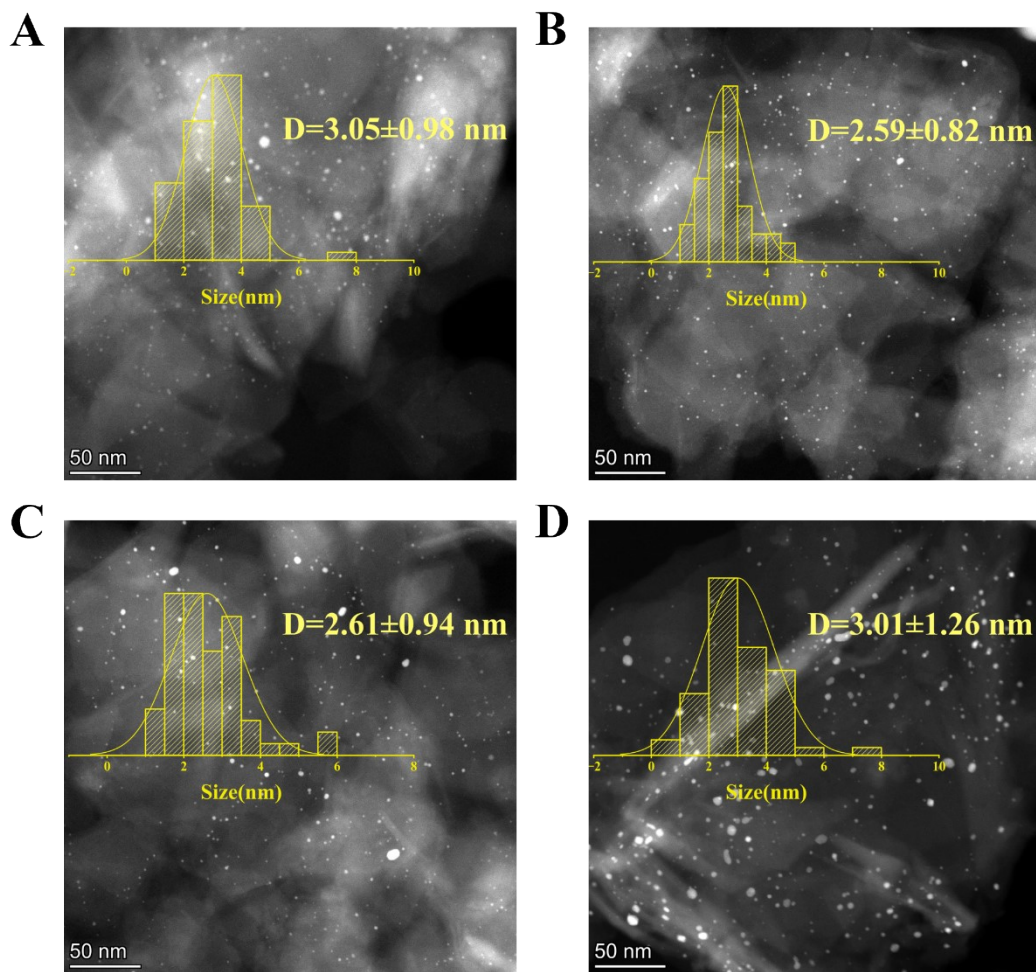

**Figure S9.** STEM images of catalysts used after (A) 2, (B) 3, and (C) 4 cycles, and (D) catalyst regenerated under air conditions.

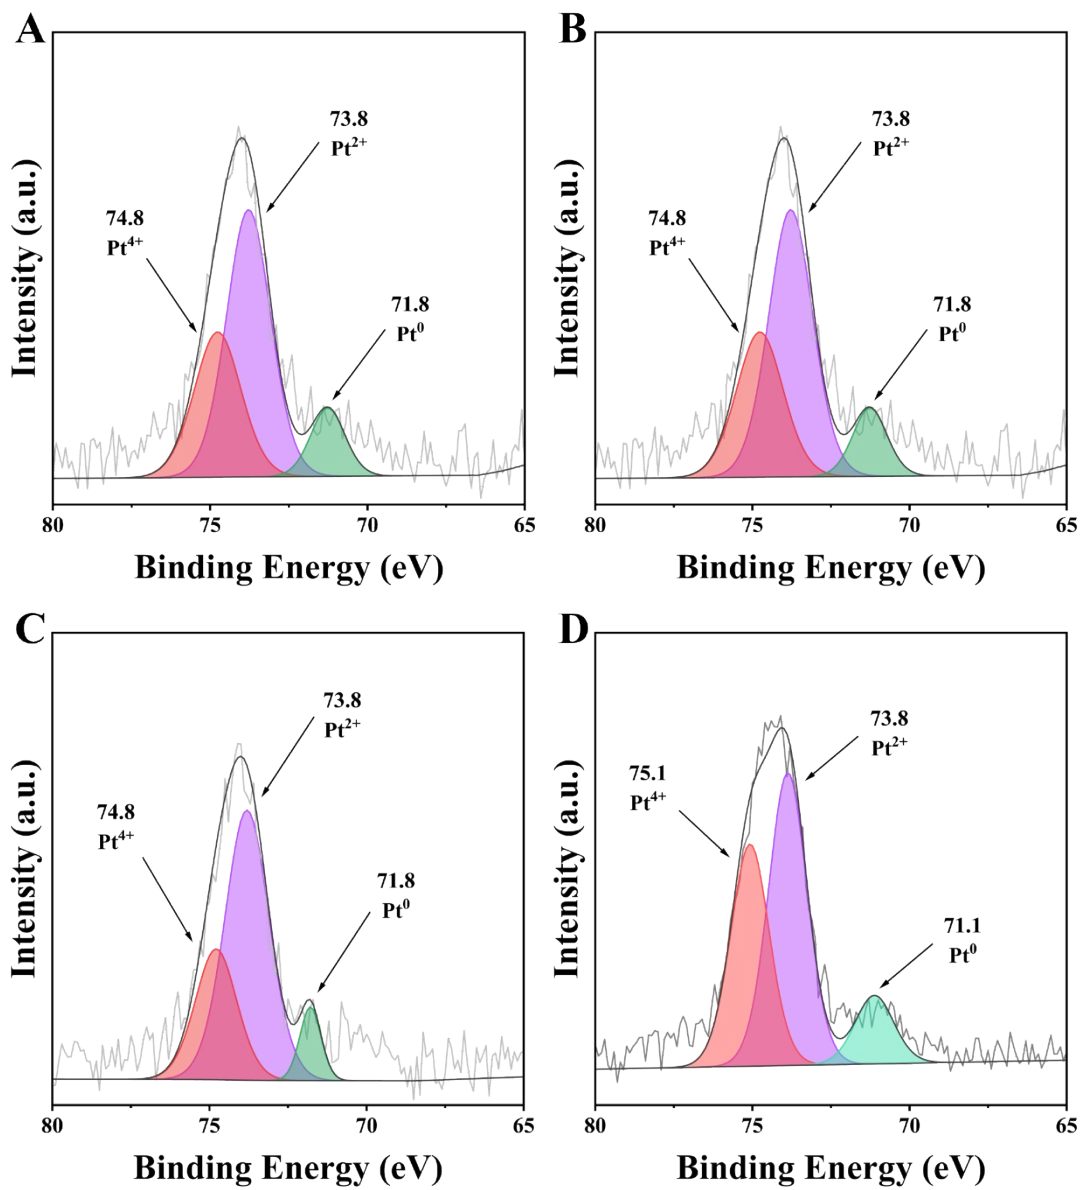

**Figure S10.** XPS spectra of catalysts used after (A) 2, (B) 3, and (C) 4 cycles, and (D) catalyst regenerated under air conditions.

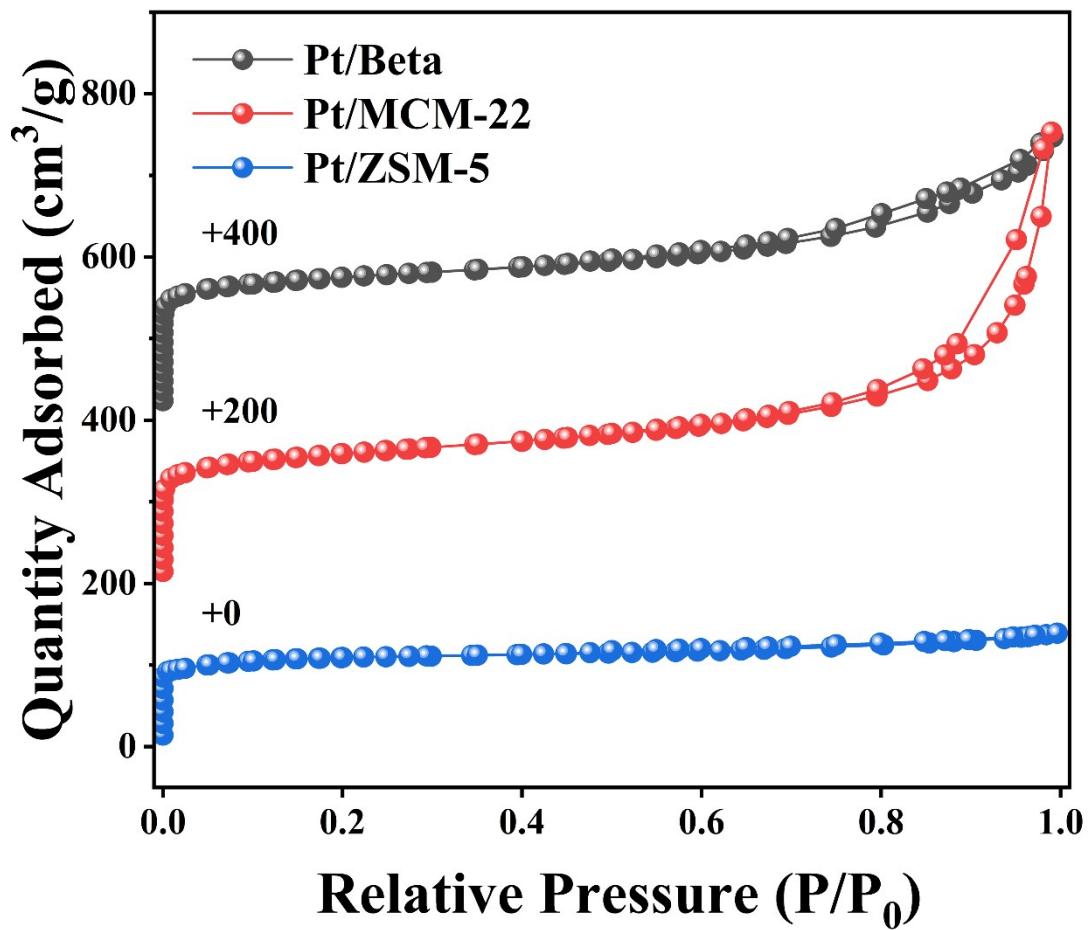

Figure S11. N<sub>2</sub> sorption isotherms of Pt/Beta, Pt/MCM-22 and Pt/ZSM-5 catalysts.

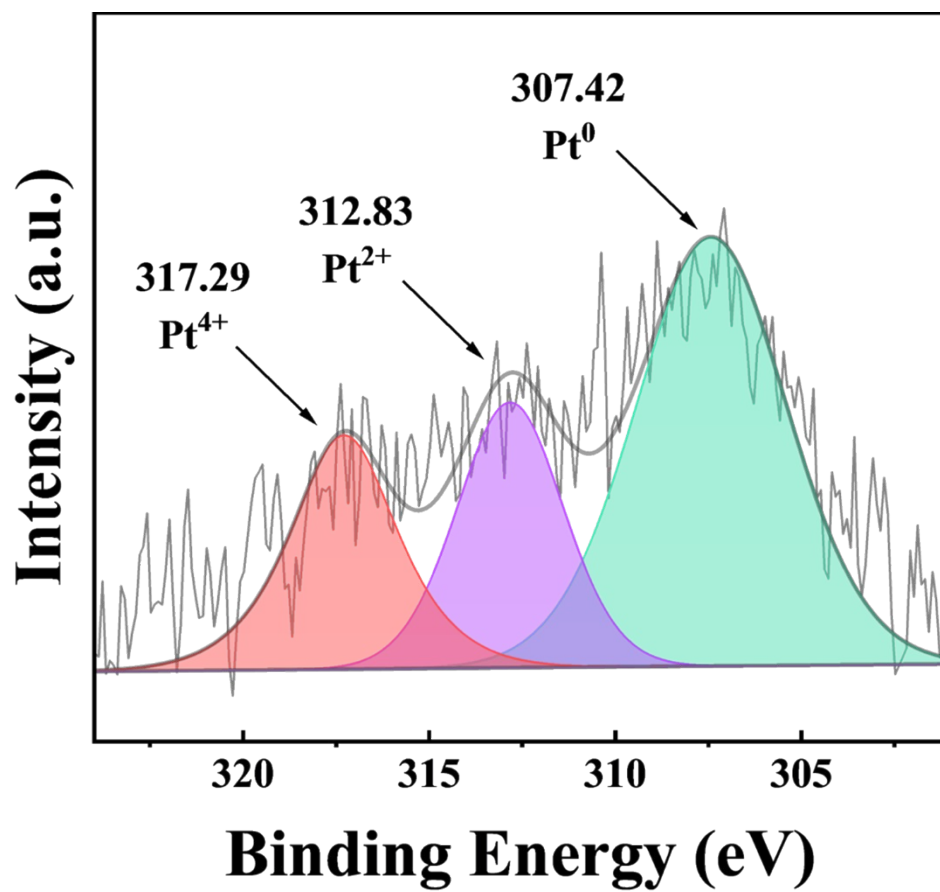

Figure S12. XPS spectrum of Pt/MCM-22 catalyst.

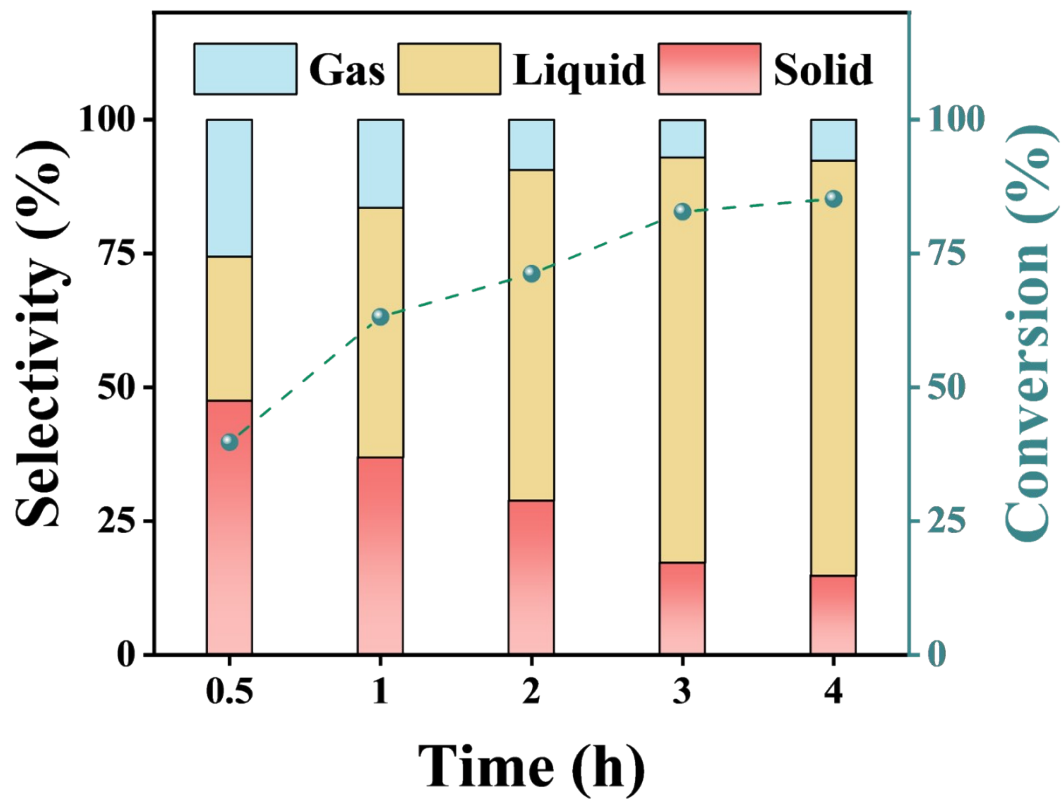

**Figure S13.** H<sub>2</sub>/D<sub>2</sub> isotope exchange experiment of PP hydrocracking over Pt/MCM-22 at different reaction times. Reaction condition: 275 °C, 3 MPa D<sub>2</sub>, 15 g PP, and 0.75 g catalyst.

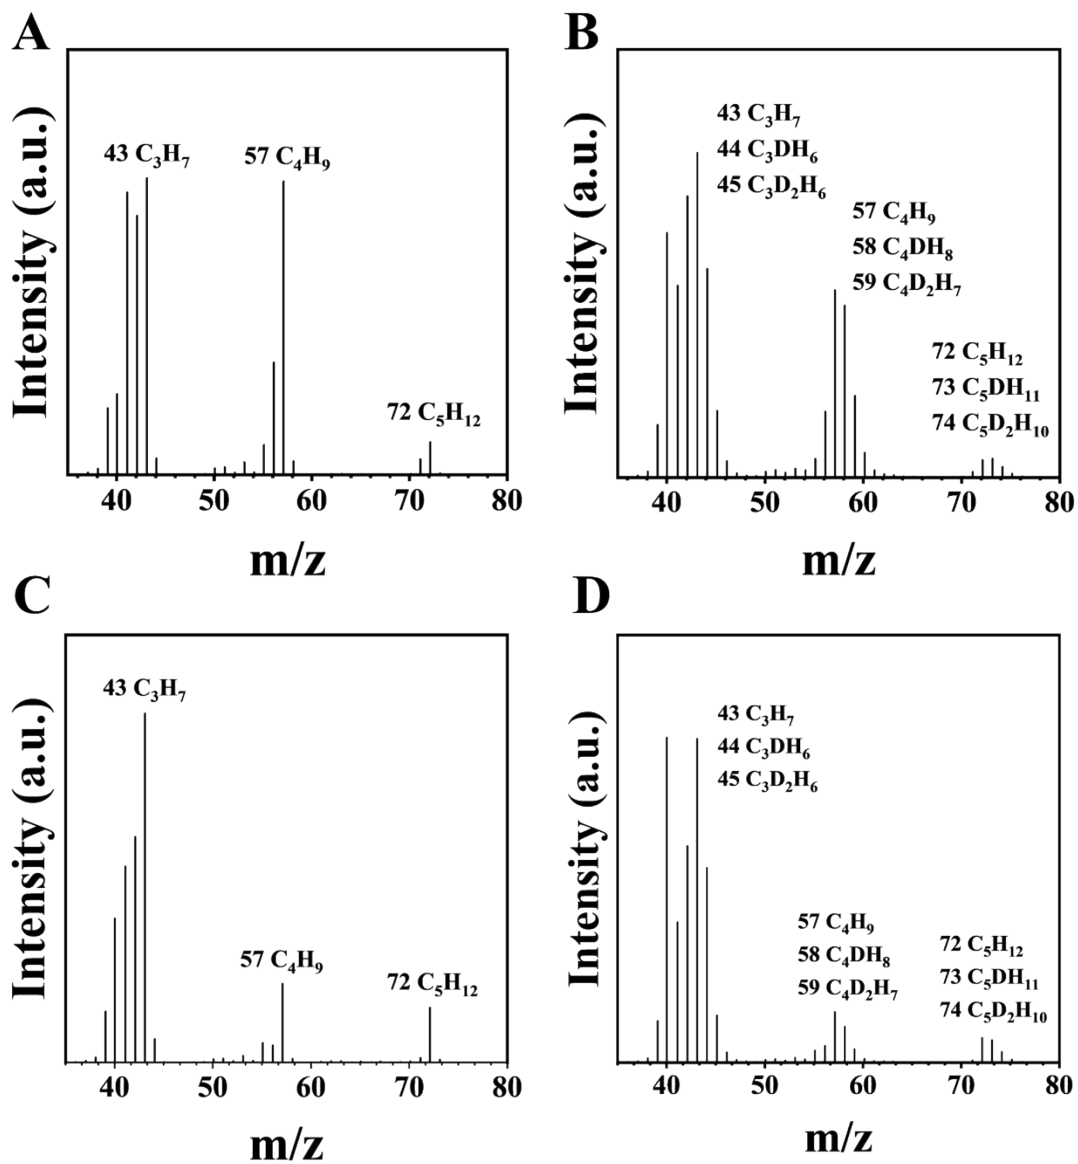

Figure S14. Mass spectra of (A)  $i\text{-C}_5\text{H}_{12}$ , (B)  $i\text{-C}_5\text{D}_2\text{H}_{10}$ , (C)  $n\text{-C}_5\text{H}_{12}$ , and (D)  $n\text{-C}_5\text{D}_2\text{H}_{10}$ .

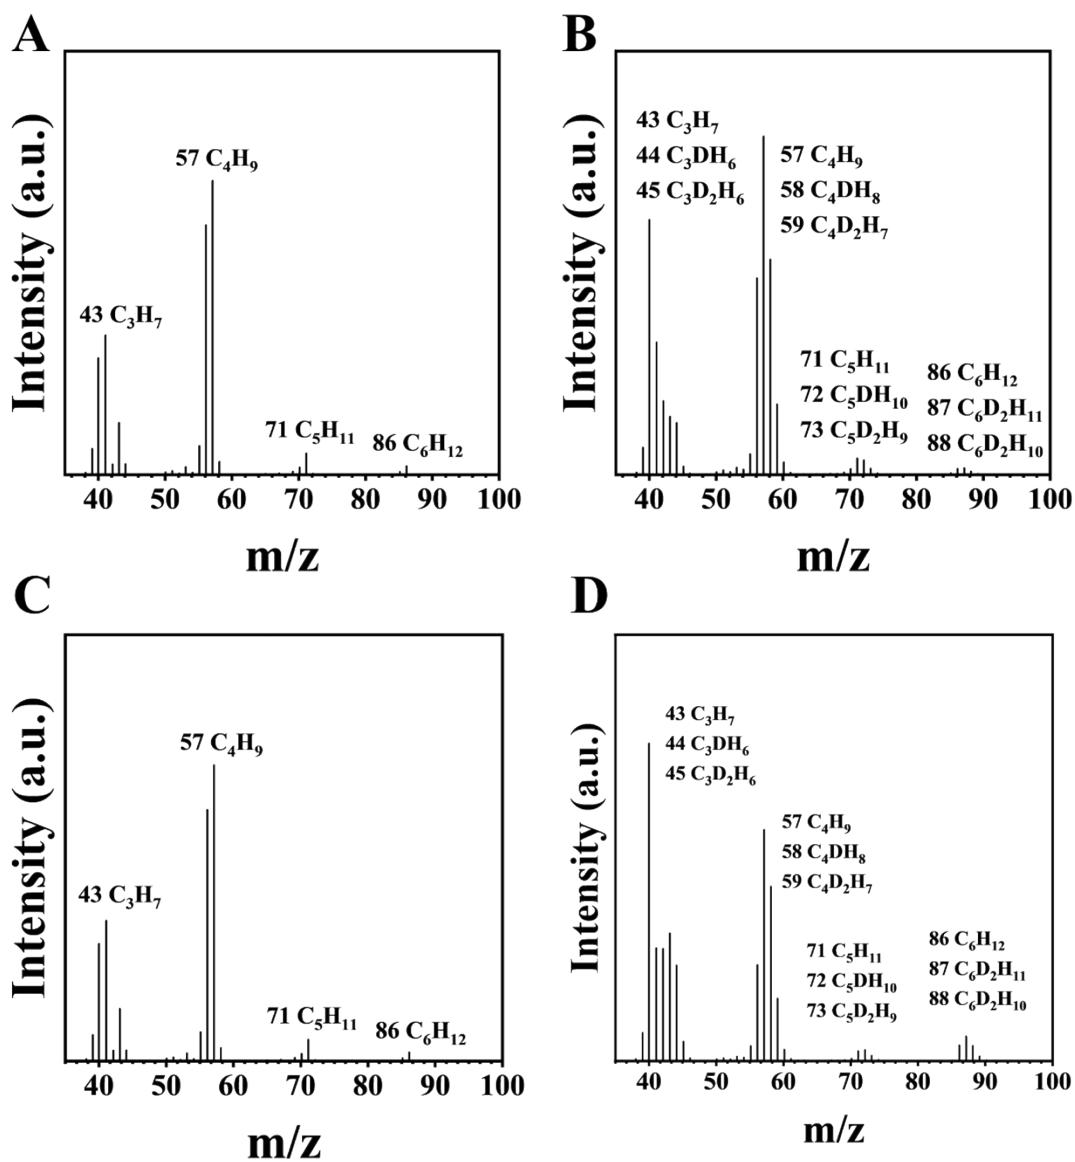

Figure S15. Mass spectra of (A)  $i$ - $C_6H_{14}$ , (B)  $i$ - $C_6D_2H_{12}$ , (C)  $n$ - $C_6H_{14}$ , and (D)  $n$ - $C_6D_2H_{12}$ .

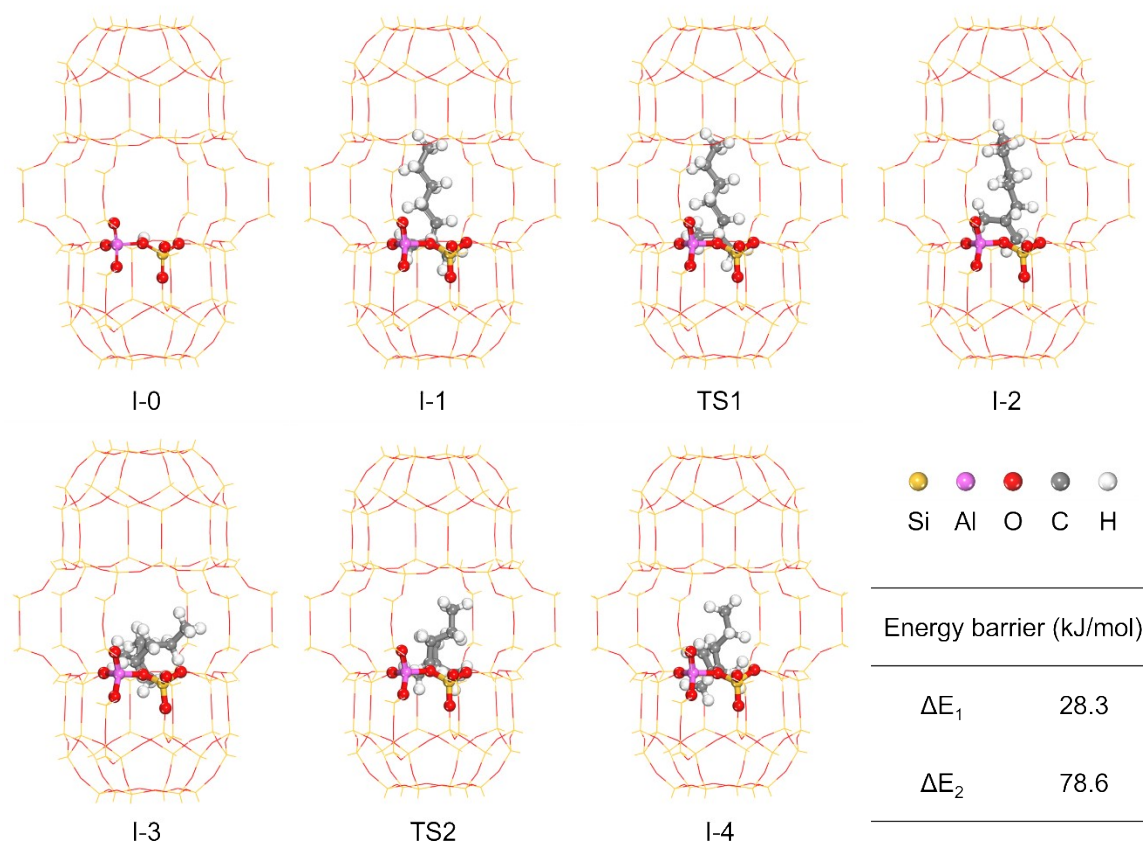

**Figure S16.** The optimized structures in the  $\beta$ -scission process on H-MWW zeolite model.

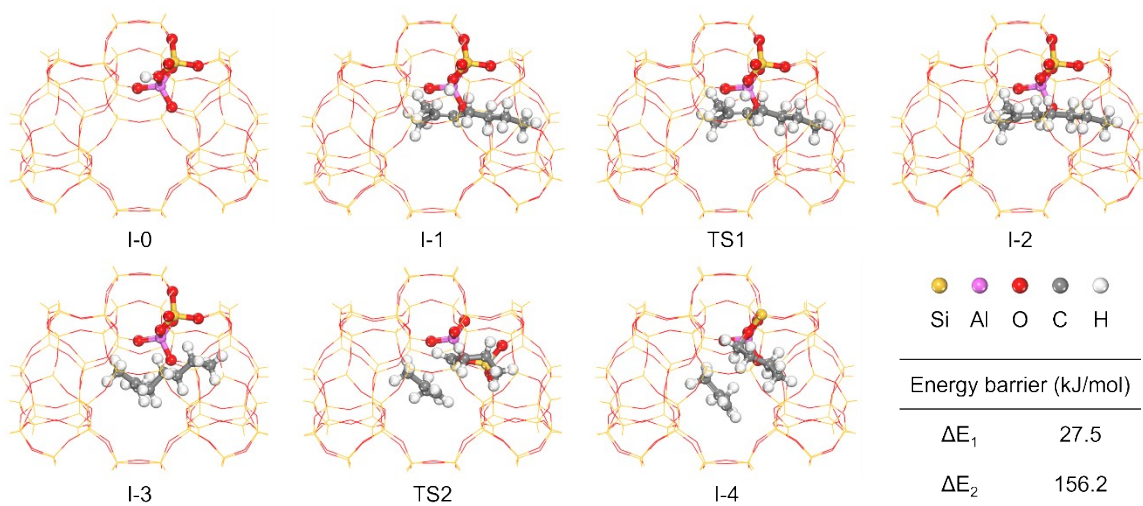

**Figure S17.** The optimized structures in the  $\beta$ -scission process on H-MFI zeolite model.

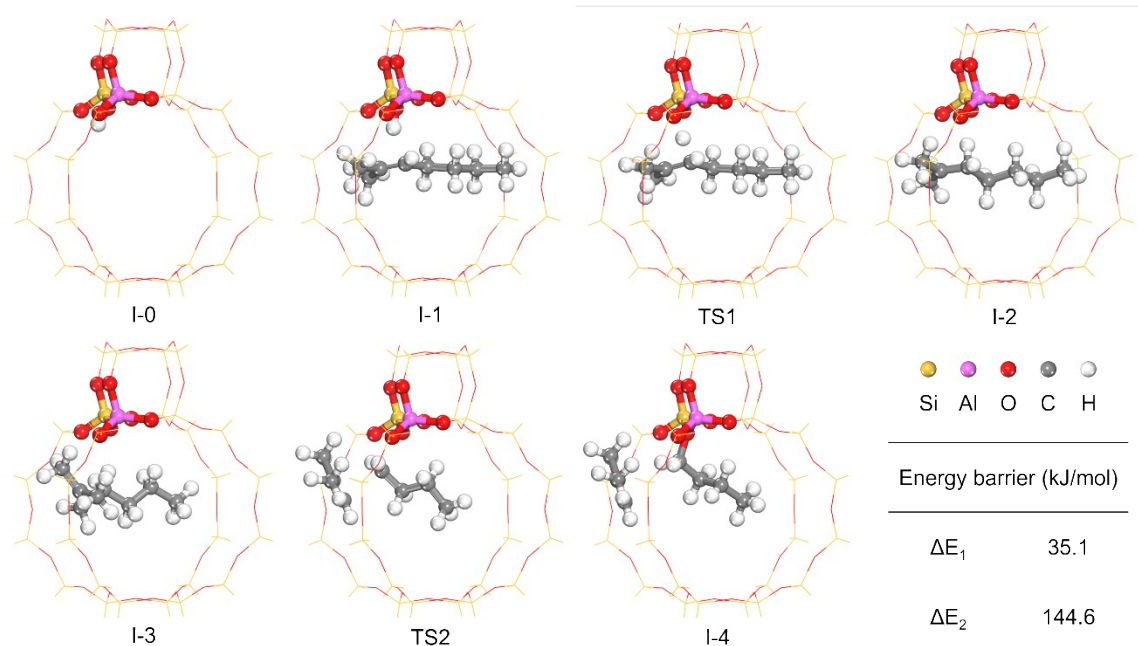

**Figure S18.** The optimized structures in the  $\beta$ -scission process on H-BEC zeolite model.

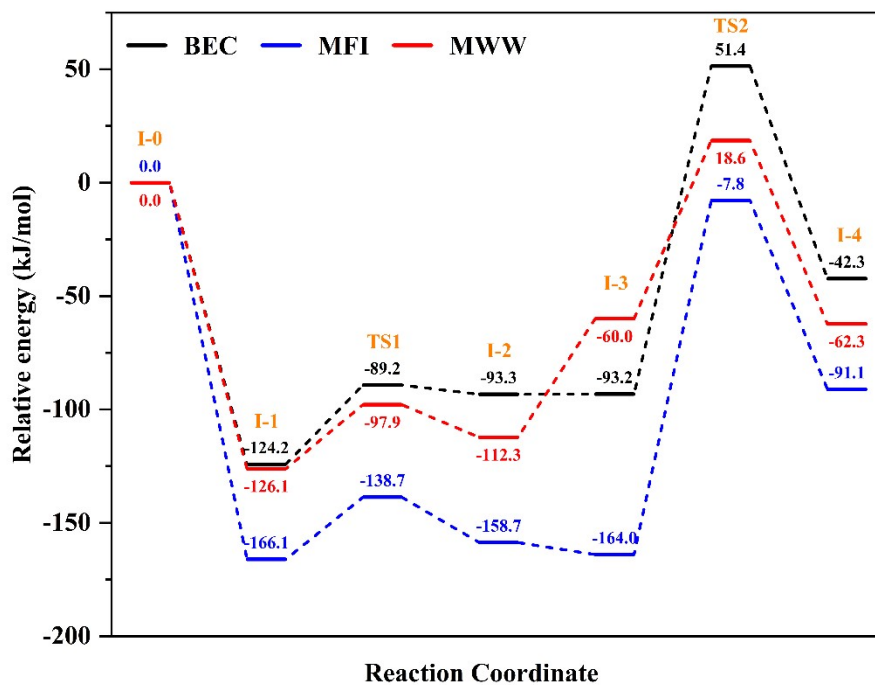

**Figure S19.** DFT calculation optimized reaction intermediates and transition states of  $\beta$ -scission of 2-methyl-2-heptene within MWW, MFI, and BEC frameworks, respectively.

**Table S1.** Si/Al ratios of various catalysts determined by ICP-OES.

| <b>Samples</b> | <b>Si/Al ratio</b> |
|----------------|--------------------|
| Y              | 3.5                |
| Beta           | 10.8               |
| MCM-22         | 13.9               |
| ZSM-5          | 14.9               |
| MCM-41         | 26.2               |
| ZSM-22         | 23.3               |
| MOR            | 8.7                |
| FER            | 13.3               |

**Table S2.** Textural properties were determined from N<sub>2</sub> sorption.

| <b>Samples</b> | <b>A<sub>BET</sub></b><br><b>(m<sup>2</sup>·g<sup>-1</sup>)</b> | <b>A<sub>micro</sub></b><br><b>(m<sup>2</sup>·g<sup>-1</sup>)</b> | <b>A<sub>meso</sub></b><br><b>(m<sup>2</sup>·g<sup>-1</sup>)</b> | <b>V<sub>micro</sub></b><br><b>(cm<sup>3</sup>·g<sup>-1</sup>)</b> | <b>V<sub>total</sub></b><br><b>(cm<sup>3</sup>·g<sup>-1</sup>)</b> |
|----------------|-----------------------------------------------------------------|-------------------------------------------------------------------|------------------------------------------------------------------|--------------------------------------------------------------------|--------------------------------------------------------------------|
| Pt/Beta        | 659                                                             | 511                                                               | 148                                                              | 0.21                                                               | 0.54                                                               |
| Pt/MCM-22      | 591                                                             | 412                                                               | 179                                                              | 0.17                                                               | 0.86                                                               |
| Pt/ZSM-5       | 414                                                             | 370                                                               | 44                                                               | 0.15                                                               | 0.22                                                               |

**Table S3.** Summary of acidities of Pt/Beta, Pt/MCM-22 and Pt/ZSM-5. Data were determined by NH<sub>3</sub>-TPD and Py-IR analyses.

| Samples   | Acidity ( $\mu\text{mol}\cdot\text{g}^{-1}$ ) |        |                            |        | Total acidity <sup>b</sup><br>( $\mu\text{mol}\cdot\text{g}^{-1}$ ) |
|-----------|-----------------------------------------------|--------|----------------------------|--------|---------------------------------------------------------------------|
|           | Brønsted acidity <sup>a</sup>                 |        | Lewis acidity <sup>a</sup> |        |                                                                     |
|           | 150 °C                                        | 350 °C | 150 °C                     | 350 °C |                                                                     |
| Pt/Beta   | 14.0                                          | 8.8    | 118.0                      | 51.4   | 1745.2                                                              |
| Pt/MCM-22 | 26.5                                          | 12.7   | 85.0                       | 40.8   | 1612.0                                                              |
| Pt/ZSM-5  | 25.8                                          | 5.4    | 83.4                       | 33.5   | 2090.0                                                              |

<sup>a</sup> Determined by Py-IR technique.

<sup>b</sup> Determined by NH<sub>3</sub>-TPD technique.
